# Supplementary material for: Inhibition of Gelatinase B (Matrix Metalloprotease-9) Activity Reduces Cellular Inflammation and Restores Function of Transplanted Pancreatic Islets
Source: PubMed Central journal article supplement — Diabetes. 2012 Jul 17;61(8):2045–53. doi: 10.2337/db11-1143 (PMC3402316; doi:10.2337/db11-1143), 2012-07-17

SUPPLEMENTARY DATA

**Supplementary Figure 1.** Islets were transplanted (Tx) in mice liver and after 30min, 4h and 24h liver was removed and frozen immediately. Cryosections were prepared and stained for F4/80 positive cells (green,). More F4/80 positive cells migrated towards islet transplanted liver after 4h (B, \*P<0.05) and 24h (C, \*\*P<0.001) compared to 30min (A). Red color is showing islets and nuclei were stained with DAPI (blue) (200× magnification). (D) Cells were counted by using Image J Software and statistic analysis (GraphPad prism software) was done for comparing control and transplanted liver F4/80 positive cells. (E) Same method was used for counting F4/80 positive cells migration in vicinity of islet at different time point after transplantation. Color of islet and F4/80 cells were interchanged for creating a comparable color with other figures.

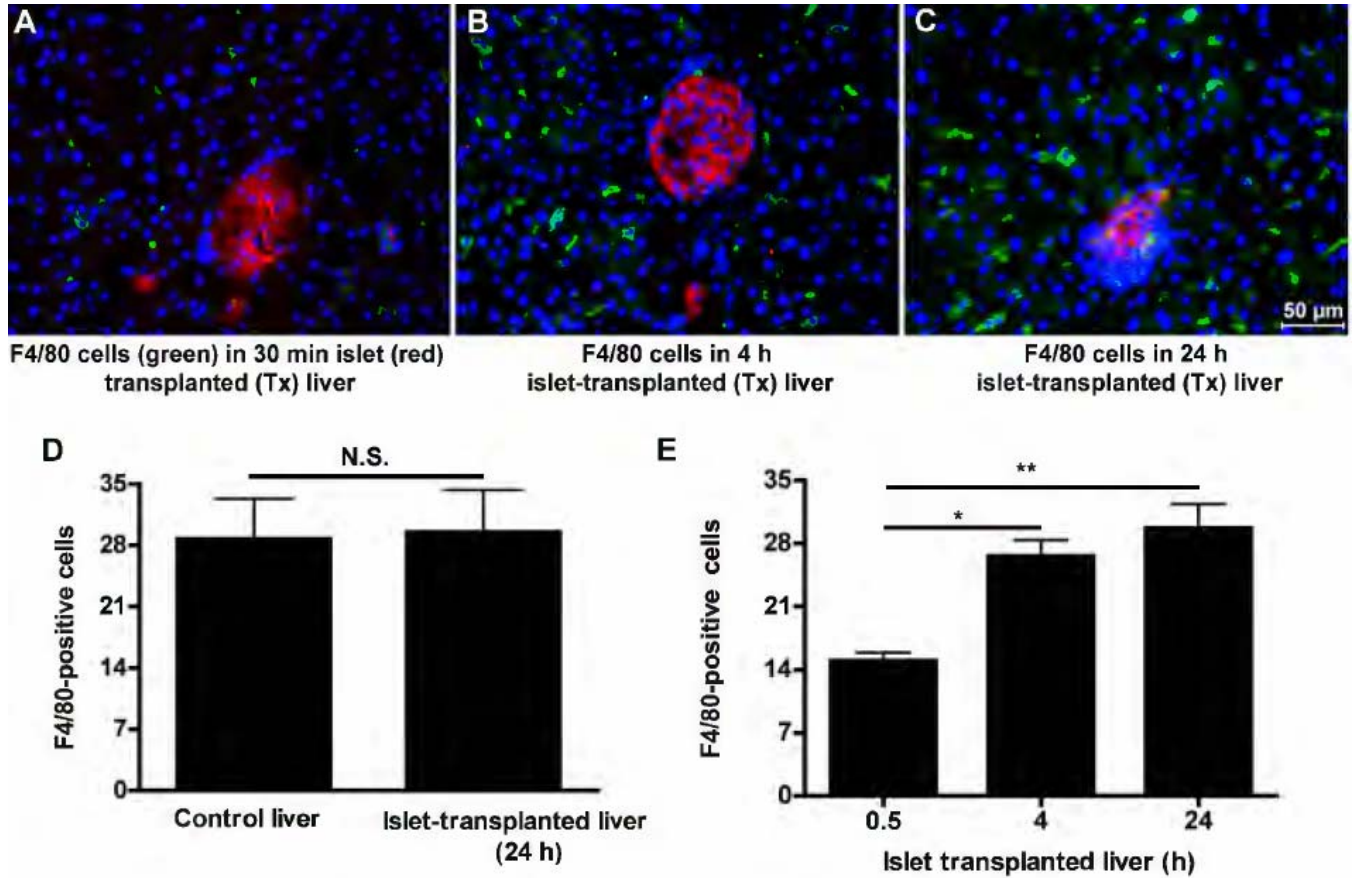

SUPPLEMENTARY DATA

**Supplementary Figure 2.** Gelatinase levels were compared in islets transplanted MMP-9KO and control mice liver by gel-gelatine zymography. There was complete inhibition of MMP-9 in islet transplanted MMP9KO mice.

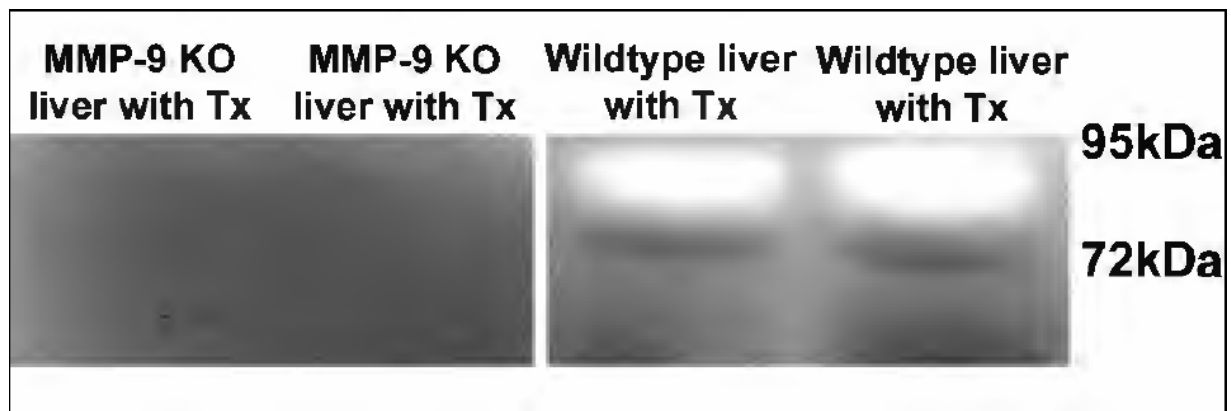

Supplement: supp_db11-1143_DB111143SupplementaryData.pdf [file supp_db11-1143_DB111143SupplementaryData.pdf]
